# Supplementary material for: Machine Learning and Pathway Analysis-Based Discovery of Metabolomic Markers Relating to Chronic Pain Phenotypes
Source: MDPI journal article supplement (doi:10.3390/ijms23095085), 2022-05-03
Supplement: s1 [file s1]

## Supplementary information

### Supplementary Figure S1: Boxplots of raw metabolomics data, without transformation

and imputation.

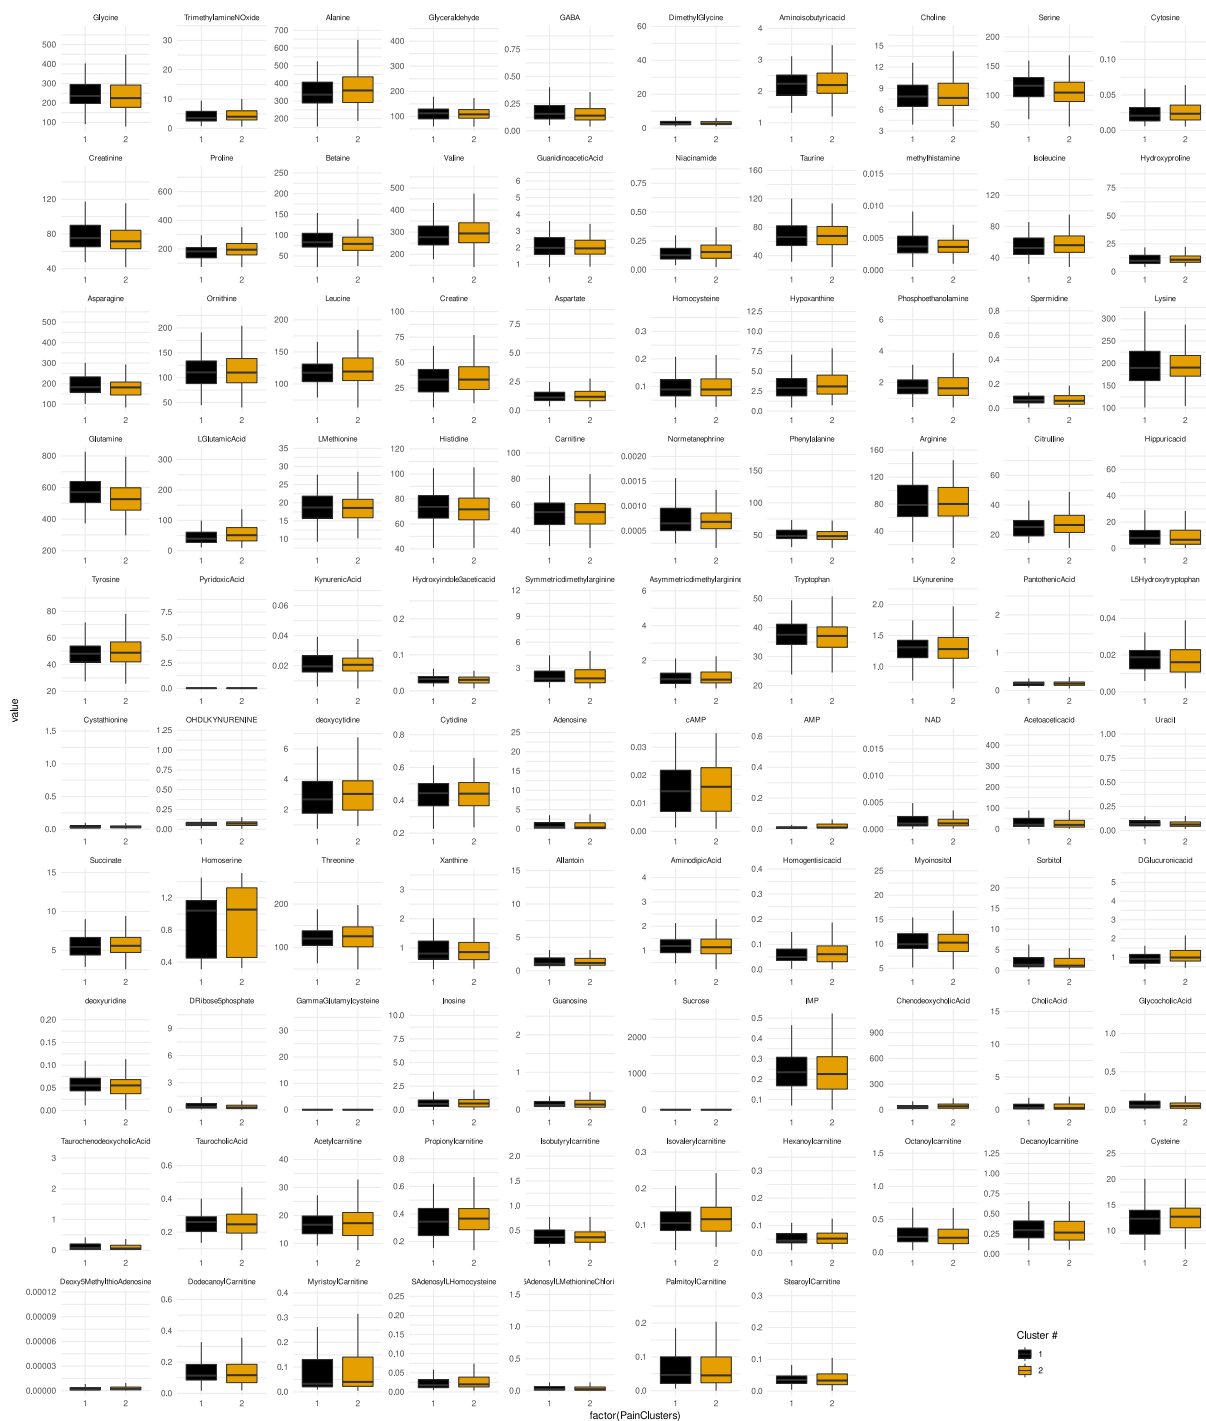

Supplementary Figure S2: Results of the variable validation procedure performed by training and testing eight different machine learning-based classification algorithms. Boxes show the balanced accuracy of the algorithms in assigning patients to pain- or sleep-related phenotype subgroups. **A:** Balanced classification accuracy when all  $d = 97$  metabolomics markers were used to train the algorithms. The boxes were constructed using the minimum, quartiles, median (solid line inside the box) and maximum of these values. **B:** Balanced classification accuracy when only seven metabolomic markers selected by the Boruta method (panel A) were used for training the algorithms. **C:** Balanced classification accuracy when the algorithms were trained with the same metabolomic markers as in panel C but after random permutation. The figure was created using the R software package (version 4.0.2 for Linux; <https://CRAN.R-project.org/>) and the R libraries "Boruta" (<https://cran.r-project.org/package=Boruta>) and "ggplot2" (<https://cran.r-project.org/package=ggplot2>). RF: random forests; SVM: support vector machines; ADA: adaptive boosting; kNN: k-nearest neighbors; CTREE: conditional inference trees; RPart: classification and regression trees; PART: partial decision trees classifier. For details of hyperparameter settings, see the methods section.

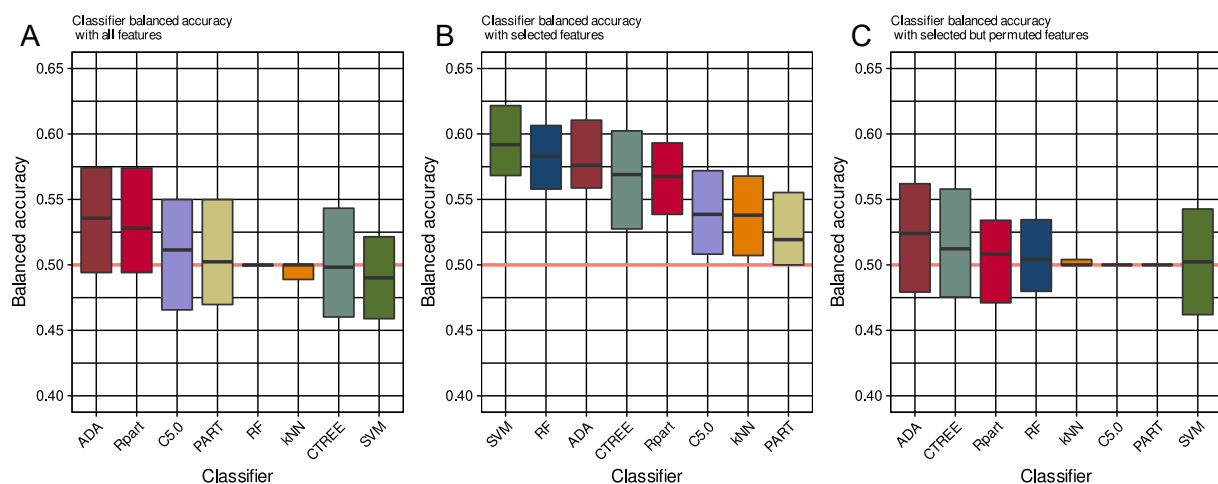

Supplementary Table S1: Enrichment sleep degradation. Holm-p = p-valued corrected for multiple testing according to the method proposed by Holm [1]), FDR = false discovery rate

[2].

|                                                      | Total<br>Cmpd | Hits | Statistic<br>Q | Expected<br>Q | Raw p     | Holm p  | FDR     |
|------------------------------------------------------|---------------|------|----------------|---------------|-----------|---------|---------|
| <b>Catecholamine Biosynthesis</b>                    | 20            | 2    | 2.7279         | 0.5291        | 0.0055365 | 0.35433 | 0.35433 |
| <b>Homocysteine Degradation</b>                      | 9             | 2    | 2.0335         | 0.5291        | 0.020851  | 1       | 0.61261 |
| <b>Thyroid hormone synthesis</b>                     | 13            | 1    | 2.5195         | 0.5291        | 0.028716  | 1       | 0.61261 |
| <b>Methionine Metabolism</b>                         | 43            | 9    | 0.96779        | 0.5291        | 0.065093  | 1       | 0.68366 |
| <b>Pyrimidine Metabolism</b>                         | 59            | 3    | 1.2591         | 0.5291        | 0.069474  | 1       | 0.68366 |
| <b>Oxidation of Branched<br/>Chain Fatty Acids</b>   | 26            | 4    | 1.0449         | 0.5291        | 0.10042   | 1       | 0.68366 |
| <b>Betaine Metabolism</b>                            | 21            | 6    | 0.92135        | 0.5291        | 0.11367   | 1       | 0.68366 |
| <b>Phenylalanine and Tyrosine<br/>Metabolism</b>     | 28            | 4    | 0.98676        | 0.5291        | 0.12222   | 1       | 0.68366 |
| <b>Glutamate Metabolism</b>                          | 49            | 8    | 0.84747        | 0.5291        | 0.12406   | 1       | 0.68366 |
| <b>Inositol Metabolism</b>                           | 33            | 2    | 1.0921         | 0.5291        | 0.12713   | 1       | 0.68366 |
| <b>Tyrosine Metabolism</b>                           | 72            | 4    | 0.93306        | 0.5291        | 0.13726   | 1       | 0.68366 |
| <b>Inositol Phosphate<br/>Metabolism</b>             | 26            | 1    | 1.1614         | 0.5291        | 0.13887   | 1       | 0.68366 |
| <b>Phosphatidylinositol<br/>Phosphate Metabolism</b> | 17            | 1    | 1.1614         | 0.5291        | 0.13887   | 1       | 0.68366 |
| <b>Phospholipid Biosynthesis</b>                     | 29            | 1    | 1.0724         | 0.5291        | 0.15507   | 1       | 0.70387 |
| <b>Fatty Acid Biosynthesis</b>                       | 35            | 1    | 1.0022         | 0.5291        | 0.16937   | 1       | 0.70387 |
| <b>Taurine and Hypotaurine</b>                       | 12            | 2    | 0.89666        | 0.5291        | 0.18405   | 1       | 0.70387 |

|                                                       |              |    |   |         |        |         |   |         |
|-------------------------------------------------------|--------------|----|---|---------|--------|---------|---|---------|
| <b>Metabolism</b>                                     |              |    |   |         |        |         |   |         |
| <b>Mitochondrial</b>                                  | <b>Beta-</b> | 27 | 2 | 0.84897 | 0.5291 | 0.19956 | 1 | 0.70387 |
| <b>Oxidation of Short Chain Saturated Fatty Acids</b> |              |    |   |         |        |         |   |         |
| <b>Fatty acid Metabolism</b>                          |              | 43 | 1 | 0.83618 | 0.5291 | 0.20956 | 1 | 0.70387 |
| <b>Mitochondrial</b>                                  | <b>Beta-</b> | 28 | 1 | 0.83618 | 0.5291 | 0.20956 | 1 | 0.70387 |
| <b>Oxidation of Long Chain Saturated Fatty Acids</b>  |              |    |   |         |        |         |   |         |
| <b>Tryptophan Metabolism</b>                          |              | 60 | 4 | 0.74453 | 0.5291 | 0.22711 | 1 | 0.70387 |
| <b>Biotin Metabolism</b>                              |              | 8  | 1 | 0.7126  | 0.5291 | 0.24687 | 1 | 0.70387 |
| <b>Phosphatidylcholine</b>                            |              | 14 | 2 | 0.71466 | 0.5291 | 0.25562 | 1 | 0.70387 |
| <b>Biosynthesis</b>                                   |              |    |   |         |        |         |   |         |
| <b>Phosphatidylethanolamine</b>                       |              | 12 | 2 | 0.71466 | 0.5291 | 0.25562 | 1 | 0.70387 |
| <b>Biosynthesis</b>                                   |              |    |   |         |        |         |   |         |
| <b>Ketone Body Metabolism</b>                         |              | 13 | 2 | 0.66429 | 0.5291 | 0.28081 | 1 | 0.70387 |
| <b>Butyrate Metabolism</b>                            |              | 19 | 2 | 0.66429 | 0.5291 | 0.28081 | 1 | 0.70387 |
| <b>Bile Acid Biosynthesis</b>                         |              | 65 | 5 | 0.65677 | 0.5291 | 0.28595 | 1 | 0.70387 |
| <b>Phenylacetate Metabolism</b>                       |              | 9  | 1 | 0.5641  | 0.5291 | 0.30306 | 1 | 0.71836 |
| <b>Galactose Metabolism</b>                           |              | 38 | 3 | 0.5733  | 0.5291 | 0.35594 | 1 | 0.80278 |
| <b>Lysine Degradation</b>                             |              | 30 | 3 | 0.50972 | 0.5291 | 0.39313 | 1 | 0.80278 |
| <b>Aspartate Metabolism</b>                           |              | 35 | 7 | 0.54035 | 0.5291 | 0.40909 | 1 | 0.80278 |
| <b>Spermidine and Spermine</b>                        |              | 18 | 2 | 0.46174 | 0.5291 | 0.41971 | 1 | 0.80278 |
| <b>Biosynthesis</b>                                   |              |    |   |         |        |         |   |         |
| <b>Starch and Sucrose</b>                             |              | 31 | 2 | 0.44128 | 0.5291 | 0.43081 | 1 | 0.80278 |
| <b>Metabolism</b>                                     |              |    |   |         |        |         |   |         |
| <b>Pantothenate and CoA</b>                           |              | 21 | 2 | 0.43228 | 0.5291 | 0.43878 | 1 | 0.80278 |

|                                                      |    |    |         |        |         |   |         |  |
|------------------------------------------------------|----|----|---------|--------|---------|---|---------|--|
| <b>Biosynthesis</b>                                  |    |    |         |        |         |   |         |  |
| <b>Beta Oxidation of Very Long Chain Fatty Acids</b> | 17 | 2  | 0.41466 | 0.5291 | 0.45419 | 1 | 0.80278 |  |
| <b>Selenoamino Acid Metabolism</b>                   |    |    |         |        |         |   |         |  |
| <b>Selenoamino Acid</b>                              | 28 | 2  | 0.41414 | 0.5291 | 0.4552  | 1 | 0.80278 |  |
| <b>Glycine and Serine Metabolism</b>                 |    |    |         |        |         |   |         |  |
| <b>Glycine and Serine</b>                            | 59 | 13 | 0.51538 | 0.5291 | 0.46833 | 1 | 0.80278 |  |
| <b>Cysteine Metabolism</b>                           |    |    |         |        |         |   |         |  |
| <b>Cysteine Metabolism</b>                           | 26 | 2  | 0.372   | 0.5291 | 0.48285 | 1 | 0.80278 |  |
| <b>Porphyrin Metabolism</b>                          |    |    |         |        |         |   |         |  |
| <b>Porphyrin Metabolism</b>                          | 40 | 1  | 0.25353 | 0.5291 | 0.49025 | 1 | 0.80278 |  |
| <b>Carnitine Synthesis</b>                           |    |    |         |        |         |   |         |  |
| <b>Carnitine Synthesis</b>                           | 22 | 4  | 0.43744 | 0.5291 | 0.50463 | 1 | 0.80278 |  |
| <b>Ammonia Recycling</b>                             |    |    |         |        |         |   |         |  |
| <b>Ammonia Recycling</b>                             | 32 | 6  | 0.44771 | 0.5291 | 0.51558 | 1 | 0.80278 |  |
| <b>Methylhistidine Metabolism</b>                    |    |    |         |        |         |   |         |  |
| <b>Methylhistidine</b>                               | 4  | 1  | 0.2174  | 0.5291 | 0.52295 | 1 | 0.80278 |  |
| <b>Propanoate Metabolism</b>                         |    |    |         |        |         |   |         |  |
| <b>Propanoate Metabolism</b>                         | 42 | 2  | 0.33079 | 0.5291 | 0.52683 | 1 | 0.80278 |  |
| <b>Nicotinate and Nicotinamide Metabolism</b>        |    |    |         |        |         |   |         |  |
| <b>Nicotinate and Nicotinamide Metabolism</b>        | 37 | 3  | 0.35827 | 0.5291 | 0.55446 | 1 | 0.81156 |  |
| <b>Glutathione Metabolism</b>                        |    |    |         |        |         |   |         |  |
| <b>Glutathione Metabolism</b>                        | 21 | 4  | 0.37876 | 0.5291 | 0.56044 | 1 | 0.81156 |  |
| <b>Sphingolipid Metabolism</b>                       |    |    |         |        |         |   |         |  |
| <b>Sphingolipid Metabolism</b>                       | 40 | 1  | 0.16134 | 0.5291 | 0.58216 | 1 | 0.81156 |  |
| <b>Valine, Leucine and Isoleucine Degradation</b>    |    |    |         |        |         |   |         |  |
| <b>Valine, Leucine and Isoleucine Degradation</b>    | 60 | 6  | 0.40933 | 0.5291 | 0.58447 | 1 | 0.81156 |  |
| <b>Fructose and Mannose Degradation</b>              |    |    |         |        |         |   |         |  |
| <b>Fructose and Mannose Degradation</b>              | 32 | 2  | 0.27559 | 0.5291 | 0.59599 | 1 | 0.81156 |  |
| <b>Amino Sugar Metabolism</b>                        |    |    |         |        |         |   |         |  |
| <b>Amino Sugar Metabolism</b>                        | 33 | 2  | 0.22546 | 0.5291 | 0.63564 | 1 | 0.84752 |  |
| <b>Glucose-Alanine Cycle</b>                         |    |    |         |        |         |   |         |  |
| <b>Glucose-Alanine Cycle</b>                         | 13 | 2  | 0.21042 | 0.5291 | 0.65629 | 1 | 0.84769 |  |
| <b>Urea Cycle</b>                                    |    |    |         |        |         |   |         |  |
| <b>Urea Cycle</b>                                    | 29 | 7  | 0.36161 | 0.5291 | 0.67242 | 1 | 0.84769 |  |

|                                                 |    |    |          |        |         |   |         |
|-------------------------------------------------|----|----|----------|--------|---------|---|---------|
| <b>Folate Metabolism</b>                        | 29 | 1  | 0.080468 | 0.5291 | 0.69764 | 1 | 0.84769 |
| <b>Arachidonic Acid Metabolism</b>              | 69 | 1  | 0.080468 | 0.5291 | 0.69764 | 1 | 0.84769 |
| <b>Alanine Metabolism</b>                       | 17 | 3  | 0.21917  | 0.5291 | 0.72099 | 1 | 0.84769 |
| <b>Glycerolipid Metabolism</b>                  | 25 | 1  | 0.059519 | 0.5291 | 0.73829 | 1 | 0.84769 |
| <b>Citric Acid Cycle</b>                        | 32 | 1  | 0.051932 | 0.5291 | 0.75497 | 1 | 0.84769 |
| <b>Mitochondrial Electron Transport Chain</b>   | 19 | 1  | 0.051932 | 0.5291 | 0.75497 | 1 | 0.84769 |
| <b>Phytanic Acid Peroxisomal Oxidation</b>      | 26 | 1  | 0.051932 | 0.5291 | 0.75497 | 1 | 0.84769 |
| <b>Histidine Metabolism</b>                     | 43 | 2  | 0.13053  | 0.5291 | 0.77537 | 1 | 0.8524  |
| <b>Warburg Effect</b>                           | 58 | 3  | 0.17896  | 0.5291 | 0.78581 | 1 | 0.8524  |
| <b>Purine Metabolism</b>                        | 74 | 9  | 0.29951  | 0.5291 | 0.80091 | 1 | 0.8543  |
| <b>Malate-Aspartate Shuttle</b>                 | 10 | 2  | 0.09706  | 0.5291 | 0.81635 | 1 | 0.8565  |
| <b>Threonine and 2-Oxobutanoate Degradation</b> | 20 | 1  | 0.021711 | 0.5291 | 0.84009 | 1 | 0.86719 |
| <b>Arginine and Proline Metabolism</b>          | 53 | 10 | 0.24     | 0.5291 | 0.91371 | 1 | 0.91533 |
| <b>Beta-Alanine Metabolism</b>                  | 34 | 4  | 0.12113  | 0.5291 | 0.91533 | 1 | 0.91533 |

## R code extract for the classification step.

```
ClassifierChoice <- c("RF", "ADA", "SVM", "kNN", "CTREE", "Rpart", "C5.0", "PART")
nIter = 100
nCluster <- length(unique(ActualDataForClassification$Clusters))
if (nCluster > 2) {
  PerformanceActualClassifiersAll_ABCreduced <- data.frame(matrix(ncol = length(ClassifierChoice), nrow = nIter * nCluster))
} else { PerformanceActualClassifiersAll_ABCreduced <- data.frame(matrix(ncol = length(ClassifierChoice), nrow = nIter)) }
if (nCluster > 2) {
  PerformanceActualClassifiersAll <- data.frame(matrix(ncol = length(ClassifierChoice), nrow = nIter * nCluster))
} else { PerformanceActualClassifiersAll <- data.frame(matrix(ncol = length(ClassifierChoice), nrow = nIter)) }
if (nCluster > 2) {
  PerformanceActualClassifiersAll_ABCreducedPermuted <- data.frame(matrix(ncol = length(ClassifierChoice), nrow = nIter *
nCluster))
} else { PerformanceActualClassifiersAll_ABCreducedPermuted <- data.frame(matrix(ncol = length(ClassifierChoice), nrow =
nIter)) }
names(PerformanceActualClassifiersAll) <- ClassifierChoice
names(PerformanceActualClassifiersAll_ABCreduced) <- ClassifierChoice
names(PerformanceActualClassifiersAll_ABCreducedPermuted) <- ClassifierChoice
##### Feature selection
for (ii2 in 1:length(ClassifierChoice)) {
  ##### Classifier performance testing
  for (ii3 in 1:2) {
    ifelse(ii3 == 2, ActualDataReduced <- subset(ActualDataForClassification, select = c("Clusters",
ABCItemsBestcountBest)),
          ActualDataReduced <- ActualDataForClassification)
    if (ii3 == 2 & ii2 == 1) FinalFeatureData <- ActualDataReduced
    library(caTools)
    library(matrixStats)
    library(pROC)
    for (ii1 in 1:2) {
      PerformanceActualClassifier <- matrix(NA, nrow = 11, ncol = 0)
      rocAUC_ActualClassifier <- vector()
      for (i in 1:nIter) {
        set.seed(42 + i)
        sample <- sample.split(ActualDataReduced$Clusters, SplitRatio = .67)
        TrainData <- subset(ActualDataReduced, sample == TRUE)
        TestData <- subset(ActualDataReduced, sample == FALSE)
        if (ii1 == 2) {
          if (ii3 == 2) {
            TrainData[names(TrainData) %in% ABCItemsBestcountBest] <- apply(TrainData[names(TrainData) %in%
ABCItemsBestcountBest], 2, sample)
          } else {
            TrainData[2:ncol(TrainData)] <- apply(TrainData[2:ncol(TrainData)], 2, sample)
          }
        }
        MatrixTrain <- subset(TrainData, select = names(TrainData)[2:ncol(TrainData)])
        MatrixTest <- subset(TestData, select = names(TestData)[2:ncol(TestData)])
        UrsachenTrain <- TrainData[, 1]
        UrsachenTest <- TestData[, 1]
        switch(ClassifierChoice[ii2],
              ADA = {
                ActualClassifierObject <- rattle::xgboost(as.factor(Clusters) ~ ., data = TrainData,
max_depth = 5, eta = 0.25, num_parallel_tree = 5, nthread = 4,
nround = 50, verbose = F)
              },
              CTREE = {
                ActualClassifierObject <- ctree(as.factor(Clusters) ~ ., data = TrainData,
control = ctree_control(minbucket = 1, cores = 3, mincriterion = 0,
maxdepth = 5, minsplit = 5))
              },
              Rpart = {
                ActualClassifierObject <- rpart(as.factor(Clusters) ~ ., data = TrainData,
method = "class", xval = 1000, parms = list(split = "gini"), control
= rpart.control(cp = 0, maxdepth = 5, minsplit = 5))
              },
              C5.0 = { ActualClassifierObject <- C5.0(as.factor(Clusters) ~ ., data = TrainData, control =
C5.0Control(fuzzyThreshold = F, minCases = 5)) },
              PART = { ActualClassifierObject <- RWeka::PART(as.factor(Clusters) ~ ., data = TrainData) },
              RF = {
                ActualClassifierObject <- randomForest(as.factor(Clusters) ~ ., data = TrainData, mtry = 3, ntree = 500,
na.action = na.roughfix)
              },
              SVM = {
                ActualClassifierObject <- ksvm(as.factor(Clusters) ~ ., data = TrainData,
kernel = "rbfdot", prob.model = TRUE, type = "nu-svc")
              },
              kNN = {
                ctrl <- trainControl(method = "repeatedcv", repeats = 3) #,classProbs=TRUE,summaryFunction = twoClassSummary)
                ActualClassifierObject <- train(as.factor(Clusters) ~ ., data = TrainData,
method = "knn", trControl = ctrl, preProcess = c("center", "scale"),
tuneLength = 10)
              },
              )
        if (ClassifierChoice[ii2] == "XXX") {
          Pred0 <- apply(ActualClassifierObject, 1, which.max)
        } else {
          Pred0 <- df_limePredict$predict
          Pred0 <- readr::parse_number(df_limePredict$predict)
        }
        Pred <- Pred0
        if (ClassifierChoice[ii2] == "ADA") {
          Pred <- round(scales::rescale(Pred0, to = c(1, 2)))
        } else {
          if (length(table(Pred0)) > nCluster | isTRUE(ncol(Pred0) > 1)) {
            if (ncol(Pred0) == nCluster) Pred <- as.vector(apply(Pred0, 1, which.max))
            else Pred <- round(scales::rescale(Pred0, to = c(1, 2)))
          }
        }
      }
    }
  }
  cTab <- table(factor(Pred, levels = 1:nCluster), factor(TestData$Clusters, levels = 1:nCluster))
}
```

```

ifelse(nCluster > 2, cMat <- t(caret::confusionMatrix(cTab)$byClass), cMat <- caret::confusionMatrix(cTab)$byClass)
PerformanceActualClassifier <- cbind(PerformanceActualClassifier, cMat)
if (ClassifierChoice[ii2] == "XXX") {
  Pred2 <- ActualClassifierObject
  colnames(Pred2) <- c(1, 2)
} else {
  Pred2 <- as.matrix(subset(df_limePredict, select = level_temp))
  colnames(Pred2) <- c(1:nCluster)
  if (length(setdiff(names(table(Pred0)), as.character(unique(UrsachenTest)))) > 0) {
    if (ClassifierChoice[ii2] != "ADA") {
      if (ncol(Pred0) == nCluster) Pred2 <- Pred0
      else {
        Pred0resc <- scales::rescale(Pred0, to = c(0, 1))
        Pred2 <- data.frame(cbind(Pred0resc, Pred0resc))
        names(Pred2) <- c(1, 2)
        Pred2[, 2] <- 1 - Pred2[, 1]
      }
    }
  }
}
rocAUC_ActualClassifier <- append(rocAUC_ActualClassifier, multiclass.roc(TestData$Clusters, Pred2, quiet = T)$auc)
}
print(paste(ClassifierChoice[ii2], c("Original data", "Permuted data")[ii1]))
print(paste("Data set", c("Full", "ABC reduced")[ii3]))
print(rowQuantiles(PerformanceActualClassifier, probs = c(0.025, 0.25, 0.5, 0.75, 0.975), na.rm = T) * 100)
print(quantile(rocAUC_ActualClassifier, probs = c(0.025, 0.25, 0.5, 0.75, 0.975), na.rm = T) * 100)
if (ii1 == 1 & ii3 == 1) PerformanceActualClassifiersAll[, ii2] <- PerformanceActualClassifier[11,]
if (ii1 == 1 & ii3 == 2) PerformanceActualClassifiersAll_ABCreduced[, ii2] <- PerformanceActualClassifier[11,]
if (ii1 == 2 & ii3 == 2) PerformanceActualClassifiersAll_ABCreducedPermuted[, ii2] <- PerformanceActualClassifier[11,]
}
}
}

```



## ***References***

1. Holm, S. (1979). A Simple Sequentially Rejective Multiple Test Procedure. *Scandinavian Journal of Statistics* 6, 65-70.
2. Benjamini, Y., and Hochberg, Y. (1995). Controlling the false discovery rate - a practical and powerful approach to multiple testing. *J. R. Stat. Soc. B.* 57.
